# Supplementary material for: The past, present and future of anti-malarial medicines
Source: Malar J. 2019 Mar 22;18:93. doi: 10.1186/s12936-019-2724-z (PMC6431062; doi:10.1186/s12936-019-2724-z)
Supplement: Supplementary file 3 — Additional file 3. SMILES strings and CID numbers for compounds. List of SMILES strings and CID numbers for every compound described in this review. [file 12936_2019_2724_MOESM3_ESM.xlsx]

## Sheet: Sheet1
Code	SMILES	CID
Artemisinin	C[C@@H](C(O1)=O)[C@@]2([H])[C@]34[C@@]1([H])O[C@@](C)(CC[C@]4([C@@H](CC2)C)[H])OO3	68827
Artemether	C[C@@H]([C@H](O1)OC)[C@@]2([H])[C@]34[C@@]1([H])O[C@@](C)(CC[C@]4([C@@H](CC2)C)[H])OO3	68911
Arteether	C[C@@H]([C@H](O1)OCC)[C@@]2([H])[C@]34[C@@]1([H])O[C@@](C)(CC[C@]4([C@@H](CC2)C)[H])OO3	3000469
Artesunate	C[C@H]1[C@@H](O[C@]2([H])O[C@@]3(OO[C@]([C@@]1([H])CC[C@H]4C)2[C@@]4([H])CC3)C)OC(CCC(O)=O)=O	6917864
Dihydroartemisinin	C[C@@H]([C@H](O1)O)[C@@]2([H])[C@]34[C@@]1([H])O[C@@](C)(CC[C@]4([C@@H](CC2)C)[H])OO3	3000518
Amodiaquine	ClC1=CC=C2C(N=CC=C2NC3=CC(CN(CC)CC)=C(O)C=C3)=C1	2165
Mefloquine	OC(C1(NCCCC1)[H])C2=CC(C(F)(F)F)=NC3=C(C(F)(F)F)C=CC=C32	4046
Piperaquine	ClC1=CC2=NC=CC(N(CC3)CCN3CCCN4CCN(C5=CC=NC6=C5C=CC(Cl)=C6)CC4)=C2C=C1	122262
Lumefantrine	CCCCN(CC(C1=C2C(/C(C3=C2C=CC(Cl)=C3)=C\C4=CC=C(C=C4)Cl)=CC(Cl)=C1)O)CCCC	6437380
Proguanil	CC(C)/N=C(N)/N=C(N)/NC1=CC=C(Cl)C=C1	4923
Atovaquone	OC1=C(C(C2=CC=CC=C2C1=O)=O)[C@H]3CC[C@H](C4=CC=C(C=C4)Cl)CC3	74989
Sulfadoxine	COC1=NC=NC(NS(=O)(C2=CC=C(C=C2)N)=O)=C1OC	17134
Pyronaridine	ClC1=CC=C2C(NC3=CC(CN4CCCC4)=C(O)C(CN5CCCC5)=C3)=C6C(C=CC(OC)=N6)=NC2=C1	5485198
Tafenoquine	CC1=CC(OC)=NC2=C(NC(CCCN)C)C=C(OC)C(OC3=CC=CC(C(F)(F)F)=C3)=C21	115358
Methylene blue	CN(C)C1=CC=C2N=C3C=C/C(C=C3SC2=C1)=[N+](C)\C.[Cl-]	6099
Fosmidomycin	ON(C([H])=O)CCCP(O)(O)=O	572
Rosiglitazone	O=C(SC1CC(C=C2)=CC=C2OCCN(C)C3=CC=CC=N3)NC1=O	77999
Imatinib	O=C(NC1=CC(NC2=NC=CC(C3=CN=CC=C3)=N2)=C(C=C1)C)C(C=C4)=CC=C4CN5CCN(C)CC5	5291
Sevuparin
NPC1161B	CC1=CC=NC2=C(N[C@@H](CCCN)C)C=C(OC)C(OC3=CC=C(Cl)C(Cl)=C3)=C21	16126827
MK4815	OC1=C(CN)C(C(C)(C)C)=CC(C(C)(C)C)=C1	10354063
CDRI 97/78	C=C(C1=CC=C(OC(C)(C)COC(CCC(O)=O)=O)C=C1)C(OO2)COC32[C@H]4C[C@H]5C[C@@H]3C[C@@H](C4)C5	9870599
GSK369796	ClC1=CC=C2C(N=CC=C2NC3=CC=C(CNC(C)(C)C)C(O)=C3)=C1	10316203
Artemisone	C[C@@H]([C@@H](O1)N2CCS(CC2)(=O)=O)[C@@]3([H])[C@]45[C@@]1([H])O[C@@](C)(CC[C@]5([C@@H](CC3)C)[H])OO4	11531457
SAR97276	CC1=C(CCO)SC=[N+]1CCCCCCCCCCCC[N+]2=CSC(CCO)=C2C.[Br-].[Br-]	11377022
AQ13	ClC1=CC=C2C(N=CC=C2NCCCN(CC)CC)=C1	3805581
M5717	O=C(NCCN1CCCC1)C2=CC(C3=CC=C(CN4CCOCC4)C=C3)=NC5=CC=C(F)C=C52	71748268
M1	CC(C=C1)=CC=C1C2=NC3=CC=C(Br)C=C3C(C(NC4=CC=CN=C4)=O)=C2	2220526
M2	CC(C=C1)=CC=C1C2=NC3=CC=C(F)C=C3C(C(NC4=CC=CN=C4)=O)=C2
M3	CC(C=C1)=CC=C1C2=NC3=CC=C(F)C=C3C(C(NCCN4CCCC4)=O)=C2
MMV253	CN(C(C)=C1)N=C1NC2=NC(NC3=CC(C4CC4)=C(F)C(C)=N3)=NC=C2N5C[C@@H](C)N(C)CC5	92045019
M'1	CN(CC1)CCN1C2=CN=C(NC3=CC=C(CC)C=C3)N=C2N4CCCC4
M'2	CN(CC1)CCN1C2=CN=C(NC3=CC=NC(C)=C3)N=C2N4CCCC4
M'3	CN(C(C)=C1)N=C1NC2=NC(NC3=CC(CC)=C(F)C(C)=N3)=NC=C2N4C[C@@H](C)NCC4	118485184
UCT943	NC1=NC=C(C2=CC=C(C(N3CCNCC3)=O)C=C2)N=C1C4=CC=C(C(F)(F)F)C=C4	71711915
U1	OC(C=C1)=C(OC)C=C1C2=CC(C3=CC=C(S(C)(=O)=O)C=C3)=CN=C2N	44525553
U2	NC1=NC=C(C2=CC=C(S(C)(=O)=O)C=C2)C=C1C3=CC=C(C(F)(F)F)C=C3	53311566
U3	NC1=NC=C(C2=CC=C(C(N3CCNCC3)=O)C=C2)C=C1C4=CC=C(C(F)(F)F)C=C4	71450257
AN13762	CC1=C(B(O)OC2)C2=CC=C1OC3=NC=C(C(N4CC(C)(O)C4)=O)N=C3	132585226
A1 (AN3661)	OB1OCC2=CC=CC(CCC(O)=O)=C21	50898347
A2	OB1OCC2=CC=C(OC3=NC=C(C(OC)=O)N=C3)C=C21	44480426
A3	OB1OCC2=CC=C(OC3=NC=C(C(N)=O)N=C3)C=C21	122178904
SC83288	O=C(OC)N1CCN(C(C2=CC=CC(NC(NC3=CC=C(S(NCC4=CC=C(S(N)(=O)=O)C=C4)(=O)=O)C=C3)=O)=C2)=N)CC1	57496162
S1	O=C(NC1=CC=CC(C(N)=N)=C1)NC2=CC(C(N)=N)=CC=C2	72074
S2	NC(C1=CC=CC(NC(NC2=CC=C(S(NCC3=CC=C(S(N)(=O)=O)C=C3)(=O)=O)C=C2)=O)=C1)=N	10368766
S3	N=C(C1=CC=CC(NC(NC2=CC=C(S(NCC3=CC=C(S(N)(=O)=O)C=C3)(=O)=O)C=C2)=O)=C1)N4CCN(CCCC)CC4	46842878
DM1157	ClC1=CC=C2C(N=CC=C2NCCCN3CCC(NC(C4=CC=CC=N4)C5=NC=CC=C5)CC3)=C1	25208163
D1 (CG)	ClC1=CC=C2C(N=CC=C2NC(C)CCCN(CC)CC)=C1	2719
D2	ClC1=CC=C2C(N=CC=C2NCCCN(C)CCCN3C(C=CC=C4)=C4CCC5=C3C=CC=C5)=C1	11698752
D3	ClC1=CC=C2C(N=CC=C2NCCCN3CCN(CC(C4=CC=CC=C4)C5=CC=CC=C5)CC3)=C1	46929560
P218	NC1=C(OCCCOC2=CC=CC=C2CCC(O)=O)C(CC)=NC(N)=N1	66563688
MTX	CN(C1=CC=C(C(N[C@H](C(O)=O)CCC(O)=O)=O)C=C1)CC2=CN=C3N=C(N=C(C3=N2)N)N	126941
PYR	CCC1=C(C2=CC=C(Cl)C=C2)C(N)=NC(N)=N1	4993
P65	NC1=C(OCCCOC2=CC(Cl)=C(Cl)C=C2Cl)C(C)=NC(N)=N1	66563689
(+)-SJ733	O=C1C2=CC=CC=C2[C@H](C(NC3=CC=C(F)C(C#N)=C3)=O)[C@@H](C4=CC=CN=C4)N1CC(F)(F)F	89508529
S'1	CC(C)CN1[C@H](C2=CC=CS2)[C@@H](C(NC3=CC=C(OC)C(Cl)=C3)=O)C4=CC=CC=C4C1=O	92361918
S'2	CC(C)CN1[C@H](C2=CC=CS2)[C@@H](C(NC3=CC=C(F)C(C#N)=C3)=O)C4=CC=CC=C4C1=O
S'3	CC(C)CN1[C@H](C2=CC=CN=C2)[C@@H](C(NC3=CC=C(F)C(C#N)=C3)=O)C4=CC=CC=C4C1=O	90348154
ACT-451840	O=C(N(CC1=CC=C(N2CCN(C(C)=O)CC2)C=C1)[C@@H](CC3=CC=CC=C3)C(N4CCN(CC5=CC=C(C#N)C=C5)CC4)=O)/C=C/C6=CC=C(C(C)(C)C)C=C6	53303762
A'1	O=C(N(CC1=CC=C(CCCCC)C=C1)[C@@H](CC2=CC=CC=C2)C(N3CCN(CC4=CC=CC=C4)CC3)=O)/C=C/C5=CC=C(C(F)(F)F)C=C5	16049171
A'2	O=C(N(CC1=CC=C(N2CCN(C(C)=O)CC2)C=C1)[C@@H](CC3=CC=CC=C3)C(N4CCN(CC5=CC=CC=C5)CC4)=O)/C=C/C6=CC=C(C(F)(F)F)C=C6
A'3	O=C(N(CC1=CC=C(N2CCN(C(C)=O)CC2)C=C1)[C@@H](CC3=CC=CC=C3)C(N4CCN(CC5=CC=CC=C5)CC4)=O)/C=C/C6=CC=C(C(C)(C)C)C=C6	53303143
OZ439	[C@H]1(C2=CC=C(OCCN3CCOCC3)C=C2)CC[C@@]4(OOC5([C@H]6C[C@H]7C[C@@H]5C[C@@H](C6)C7)O4)CC1	24999143
O1 (OZ277)	O=C(NCC(C)(C)N)C[C@H]1CC[C@@]2(OOC3([C@H]4C[C@H]5C[C@@H]3C[C@@H](C4)C5)O2)CC1
O2	NC(C)(C)CCOC(C=C1)=CC=C1[C@H]2CC[C@@]3(OOC4([C@H]5C[C@H]6C[C@@H]4C[C@@H](C5)C6)O3)CC2	24999767
O3	[C@H]1(C2=CC=C(OCCN3CCNCC3)C=C2)CC[C@@]4(OOC5([C@H]6C[C@H]7C[C@@H]5C[C@@H](C6)C7)O4)CC1	59729336
KAF156	O=C(CN)N1CCN2C(C1(C)C)=NC(C3=CC=C(F)C=C3)=C2NC4=CC=C(F)C=C4	49856296
K1	O=C(CN)N1CCN2C(C1)=NC(C3=CC=CC=C3)=C2NC4=CC=C(OCO5)C5=C4	45488686
K2	O=C(CN)N1CCN2C(C1)=NC(C3=CC=C(F)C=C3)=C2NC4=CC=C(F)C=C4	53387245
KAE609	ClC1=CC2=C(C=C1)NC([C@@](N[C@@H](C)C3)2C4=C3C5=CC(F)=C(Cl)C=C5N4)=O	44469321
K'1	CC(CC1)NC2(C(NC3=C2C=C(Br)C=C3)=O)C4=C1C5=CC=CC=C5N4	46889859
K'2	C[C@@H](CC1)N[C@@]2(C(NC3=C2C=C(Br)C=C3)=O)C4=C1C5=CC=CC=C5N4	46867516
K'3	ClC1=CC2=C(C=C1)NC([C@@](N[C@@H](C)C3)2C4=C3C5=CC=CC=C5N4)=O	46179404
DSM265	CC1=NC2=NC(C(F)(F)C)=NN2C(NC3=CC=C(S(F)(F)(F)(F)F)C=C3)=C1	51347395
D'1	CC1=NC2=NC=NN2C(NC3=CC(C=CC=C4)=C4C=C3)=C1	660996
D'2	CC1=NC2=NC=NN2C(NC3=CC=C(C(F)(F)F)C=C3)=C1	25263414
D'3	CC1=NC2=NC(C(F)(F)C)=NN2C(NC3=CC=C(C(F)(F)F)C=C3)=C1	51349276
MMV048	NC1=NC=C(C2=CC=C(S(C)(=O)=O)C=C2)C=C1C3=CN=C(C(F)(F)F)C=C3	53311393
M''1	NC1=NC=C(C2=CC=C(S(C)(=O)=O)C=C2)C=C1C3=CC(OC)=C(O)C=C3	44525553
M''2	NC1=NC=C(C2=CC=C(S(C)(=O)=O)C=C2)C=C1C3=CN=C(OC)C=C3	44525560
